# Supplementary material for: Integration of cell wall synthesis and chromosome segregation during cell division in Caulobacter
Source: PubMed Central journal article supplement — J Cell Biol. 2023 Nov 28;223(2):e202211026. doi: 10.1083/jcb.202211026 (PMC10683668; doi:10.1083/jcb.202211026), 2023-11-28

*P<sub>xyI</sub>* EV or *fzIA* variant

*ftsWI* variant

Inducer

Dilution

| EV     |        |        |        | WT     |      |        |      |
|--------|--------|--------|--------|--------|------|--------|------|
| WT     |        | hyp    |        | WT     |      | hyp    |      |
| -      | +      | -      | +      | -      | +    | -      | +    |
| undil. | undil. | undil. | undil. | undil. | 1:20 | undil. | 1:20 |

100kDa

75kDa

50kDa

37kDa

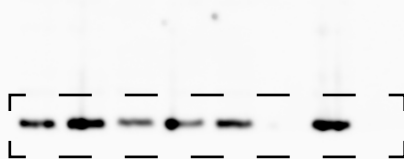

$\alpha$ MreB

$P_{xyl}$  EV or *fzIA* variant

*ftsWI* variant

Inducer

Dilution

| EV     |        |        |        | WT     |      |        |      |
|--------|--------|--------|--------|--------|------|--------|------|
| WT     |        | hyp    |        | WT     |      | hyp    |      |
| -      | +      | -      | +      | -      | +    | -      | +    |
| undil. | undil. | undil. | undil. | undil. | 1:20 | undil. | 1:20 |

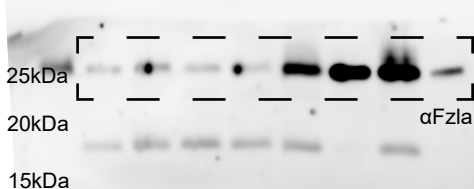

*P<sub>xyI</sub>* EV or *fzIA* variant

*ftsWI* variant

Inducer

Dilution

| D227K  |      |        |      | NB2    |      |        |      |
|--------|------|--------|------|--------|------|--------|------|
| hyp    |      | WT     |      | WT     |      | hyp    |      |
| -      | +    | -      | +    | -      | +    | -      | +    |
| undil. | 1:20 | undil. | 1:20 | undil. | 1:20 | undil. | 1:20 |

100kDa

75kDa

50kDa

37kDa

αMreB

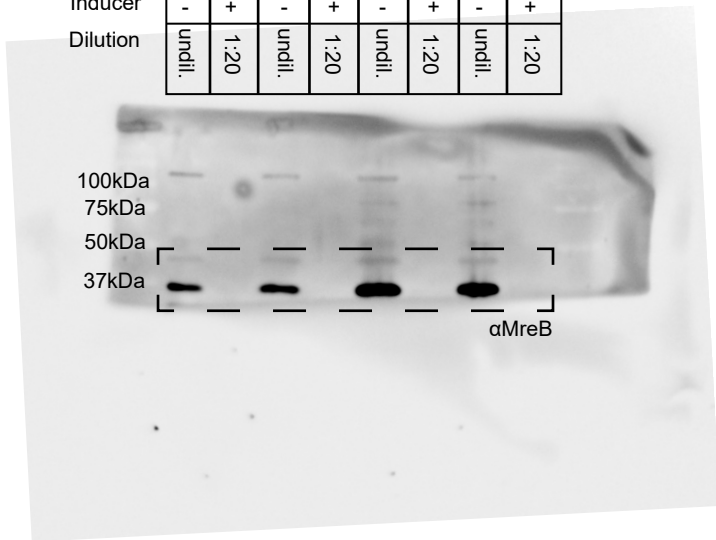

*P<sub>xyI</sub>* EV or *fzIA* variant

*ftsWI* variant

Inducer

Dilution

| D227K  |      |        |      | NB2    |      |        |      |
|--------|------|--------|------|--------|------|--------|------|
| hyp    |      | WT     |      | WT     |      | hyp    |      |
| -      | +    | -      | +    | -      | +    | -      | +    |
| undil. | 1:20 | undil. | 1:20 | undil. | 1:20 | undil. | 1:20 |

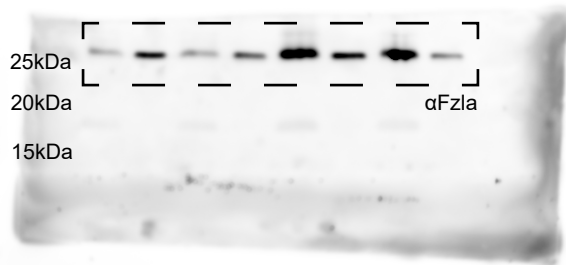

$P_{xyl}$  EV or *fzIA* variant

*ftsWI* variant

Inducer

| EV |   |     |   | WT |   |     |   |
|----|---|-----|---|----|---|-----|---|
| WT |   | hyp |   | WT |   | hyp |   |
| +  | - | -   | + | -  | + | -   | + |

100kDa

75kDa

50kDa

37kDa

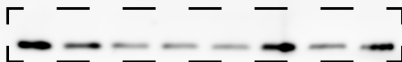

$\alpha$ MreB

*P<sub>xyt</sub>* EV or *fzIA* variant

*ftsWI* variant

Inducer

| EV |   |     |   | WT |   |     |   |
|----|---|-----|---|----|---|-----|---|
| WT |   | hyp |   | WT |   | hyp |   |
| +  | - | -   | + | -  | + | -   | + |

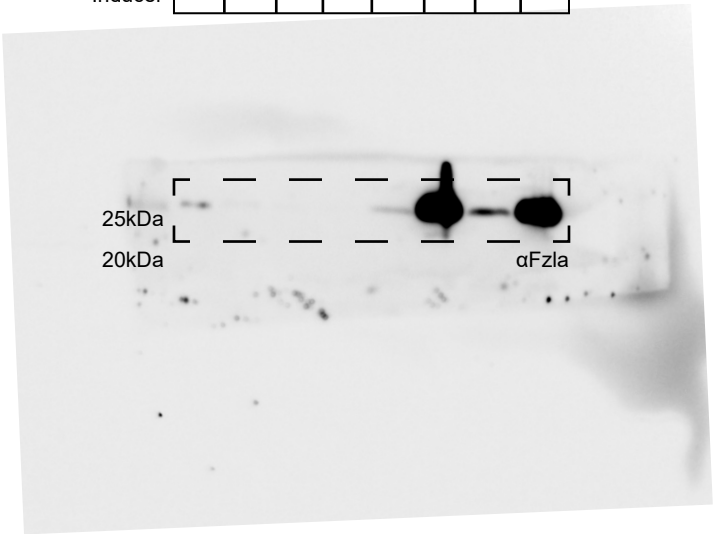

*P<sub>xyI</sub>* EV or *fzIA* variant

*ftsWI* variant

Inducer

| D227K |   |    |   | NB2 |   |     |   |
|-------|---|----|---|-----|---|-----|---|
| hyp   |   | WT |   | WT  |   | hyp |   |
| -     | + | -  | + | -   | + | -   | + |

100kDa

75kDa

50kDa

37kDa

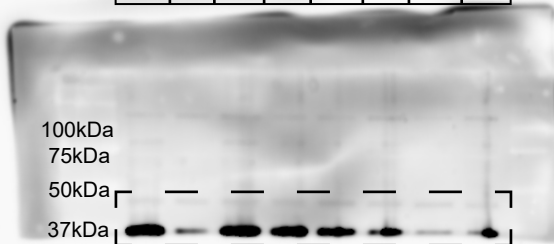

$\alpha$ MreB

|                                                  |       |   |    |   |     |   |     |   |
|--------------------------------------------------|-------|---|----|---|-----|---|-----|---|
| <i>P<sub>xyI</sub></i> EV or <i>fzIA</i> variant | D227K |   |    |   | NB2 |   |     |   |
|                                                  | hyp   |   | WT |   | WT  |   | hyp |   |
| <i>ftsWI</i> variant                             | -     | + | -  | + | -   | + | -   | + |
| Inducer                                          | -     | + | -  | + | -   | + | -   | + |

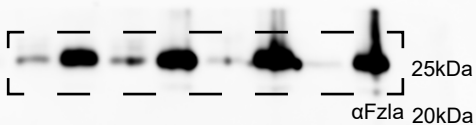



|                                                   |    |     |          |
|---------------------------------------------------|----|-----|----------|
| <i>fzIA</i> <sup>WT</sup> or $\Delta$ <i>fzIA</i> | WT | WT  | $\Delta$ |
| <i>ftsWI</i> variant                              | WT | hyp |          |

*HALO-ftsW*

100kDa

75kDa

50kDa

37kDa

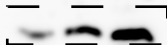

$\alpha$ MreB

|                                                   |    |     |                  |
|---------------------------------------------------|----|-----|------------------|
| <i>fzIA</i> <sup>WT</sup> or $\Delta$ <i>fzIA</i> | WT | WT  | $\Delta$         |
| <i>ftsWI</i> variant                              | WT | hyp |                  |
|                                                   |    |     | <i>HALO-ftsW</i> |

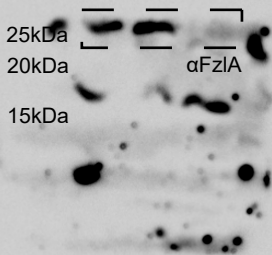

|                                                         |       |        |        |         |              |
|---------------------------------------------------------|-------|--------|--------|---------|--------------|
| <i>fzIA::gentR</i><br><i>xyfX::P<sub>xyf</sub> fzIA</i> |       |        |        |         |              |
| % Xylose                                                |       |        |        |         | 0.2% Glucose |
| WT                                                      | 0.001 | 0.0005 | 0.0001 | 0.00005 |              |

100kDa

75kDa

50kDa

37kDa

$\alpha$ MreB

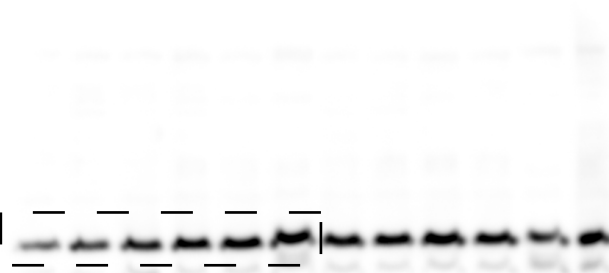

|                                   |              |        |        |         |
|-----------------------------------|--------------|--------|--------|---------|
| <i>fzIA::gentR</i>                |              |        |        |         |
| <i>xylX::P<sub>xyl</sub> fzIA</i> |              |        |        |         |
| % Xylose                          |              |        |        |         |
| WT                                | 0.001        | 0.0005 | 0.0001 | 0.00005 |
|                                   | 0.2% Glucose |        |        |         |

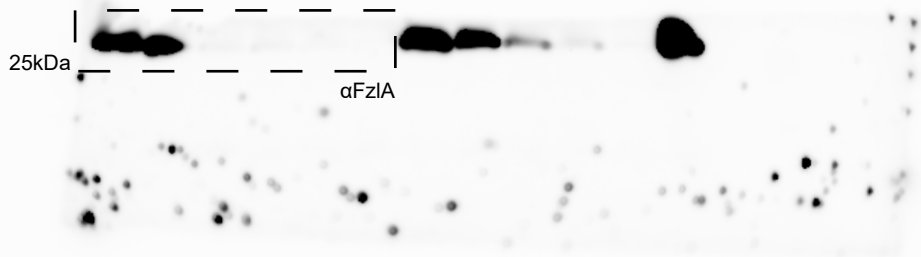

|    | Time depleted (h) |   |   |    |    |
|----|-------------------|---|---|----|----|
| WT | 0                 | 4 | 7 | 12 | 23 |

150kDa

100kDa

75kDa

50kDa

37kDa

$\alpha$ MreB

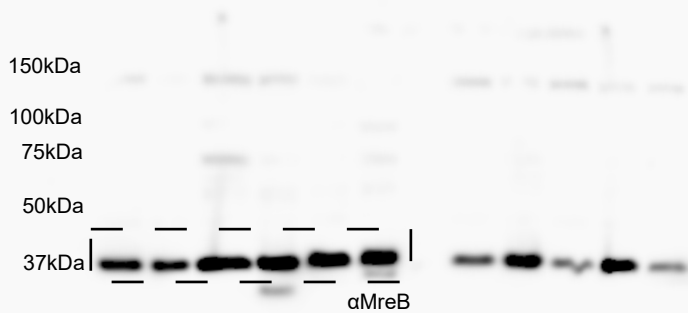

| Time depleted (h) |   |   |   |    |    |
|-------------------|---|---|---|----|----|
| WT                | 0 | 4 | 7 | 12 | 23 |

25kDa

20kDa

15kDa

$\alpha$ FzIA

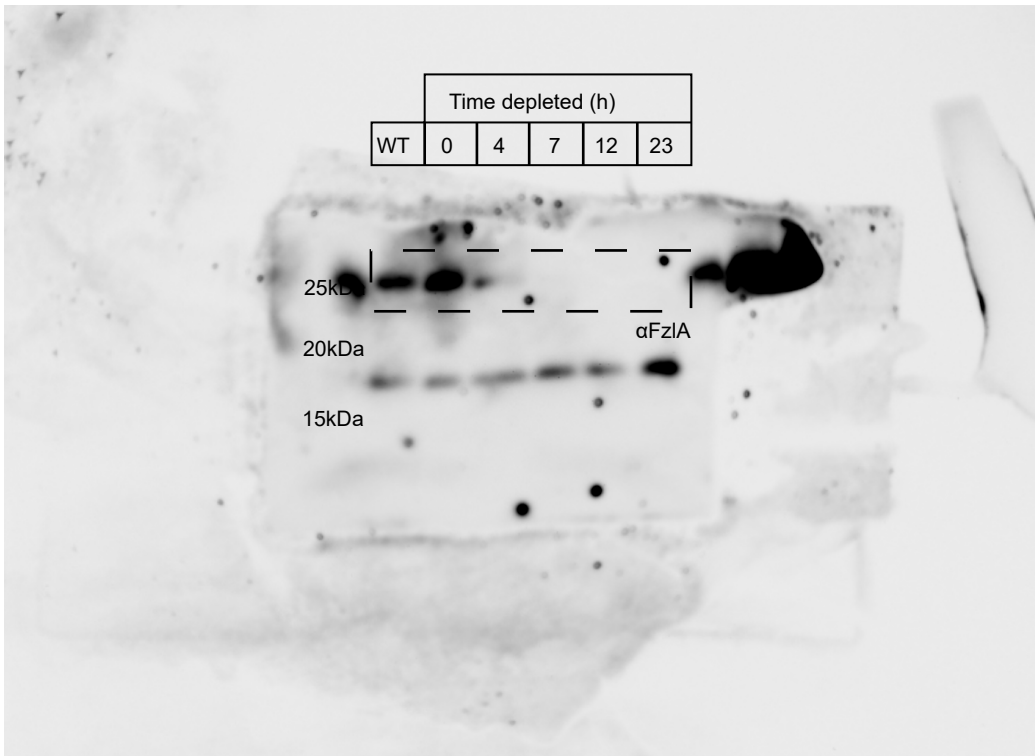

|                                                        |    |    |     |    |    |    |     |    |                  |
|--------------------------------------------------------|----|----|-----|----|----|----|-----|----|------------------|
| <i>P<sub>xyI</sub></i> EV or <i>fzIA</i> <sup>WT</sup> | EV | WT | EV  | WT | EV | WT | EV  | WT |                  |
| <i>ftsWI</i> variant                                   | WT |    | hyp |    | WT |    | hyp |    | <i>HALO-ftsW</i> |
| Inducer                                                | -  |    |     |    | +  |    |     |    |                  |

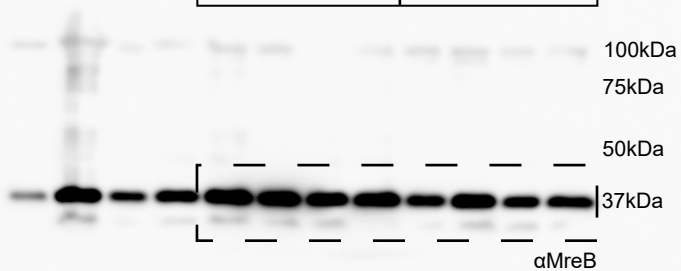

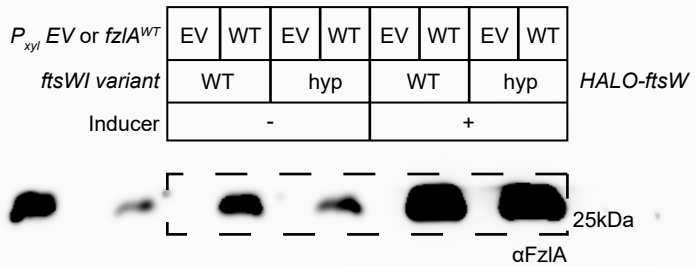

Supplement: JCB_202211026_SourceDataFS1.pdf [file JCB_202211026_SourceDataFS1.pdf]
