# Supplementary material for: Integration of cell wall synthesis and chromosome segregation during cell division in Caulobacter
Source: PubMed Central journal article supplement — J Cell Biol. 2023 Nov 28;223(2):e202211026. doi: 10.1083/jcb.202211026 (PMC10683668; doi:10.1083/jcb.202211026), 2023-11-28

### 3x-FLAG-FziA IP

| Input |   |   | Eluted |   |   |
|-------|---|---|--------|---|---|
| +     | - | + | +      | - | + |
| -     | + | + | -      | + | + |

3xFLAG-FziA

FtsK-mChy

37kDa

25kDa

20kDa

15kDa

WB: αFLAG

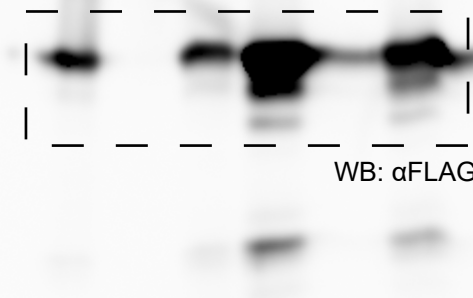

### 3x-FLAG-FzIA IP

| Input |   |   | Eluted |   |   |
|-------|---|---|--------|---|---|
| +     | - | + | +      | - | + |
| -     | + | + | -      | + | + |

3xFLAG-FzIA

FtsK-mChy

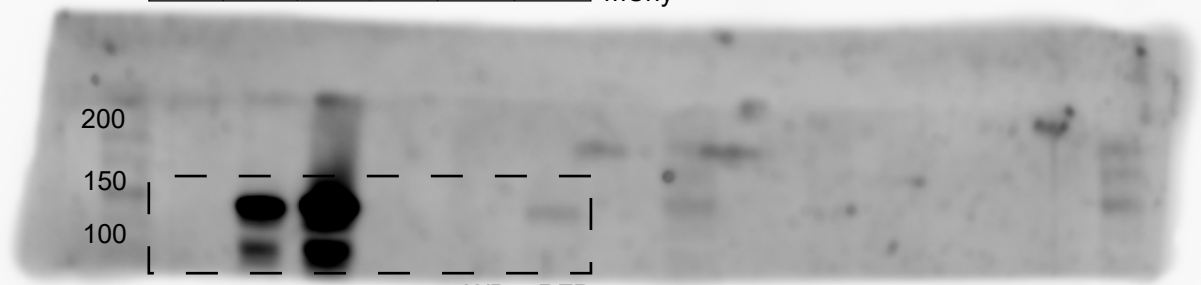

WB: αRFP

### FtsK-FLAG IP

| Input |   | Eluted |   |
|-------|---|--------|---|
| -     | + | -      | + |

150kDa  
100kDa  
75kDa  
50kDa

FtsK-FLAG

WB: αFLAG

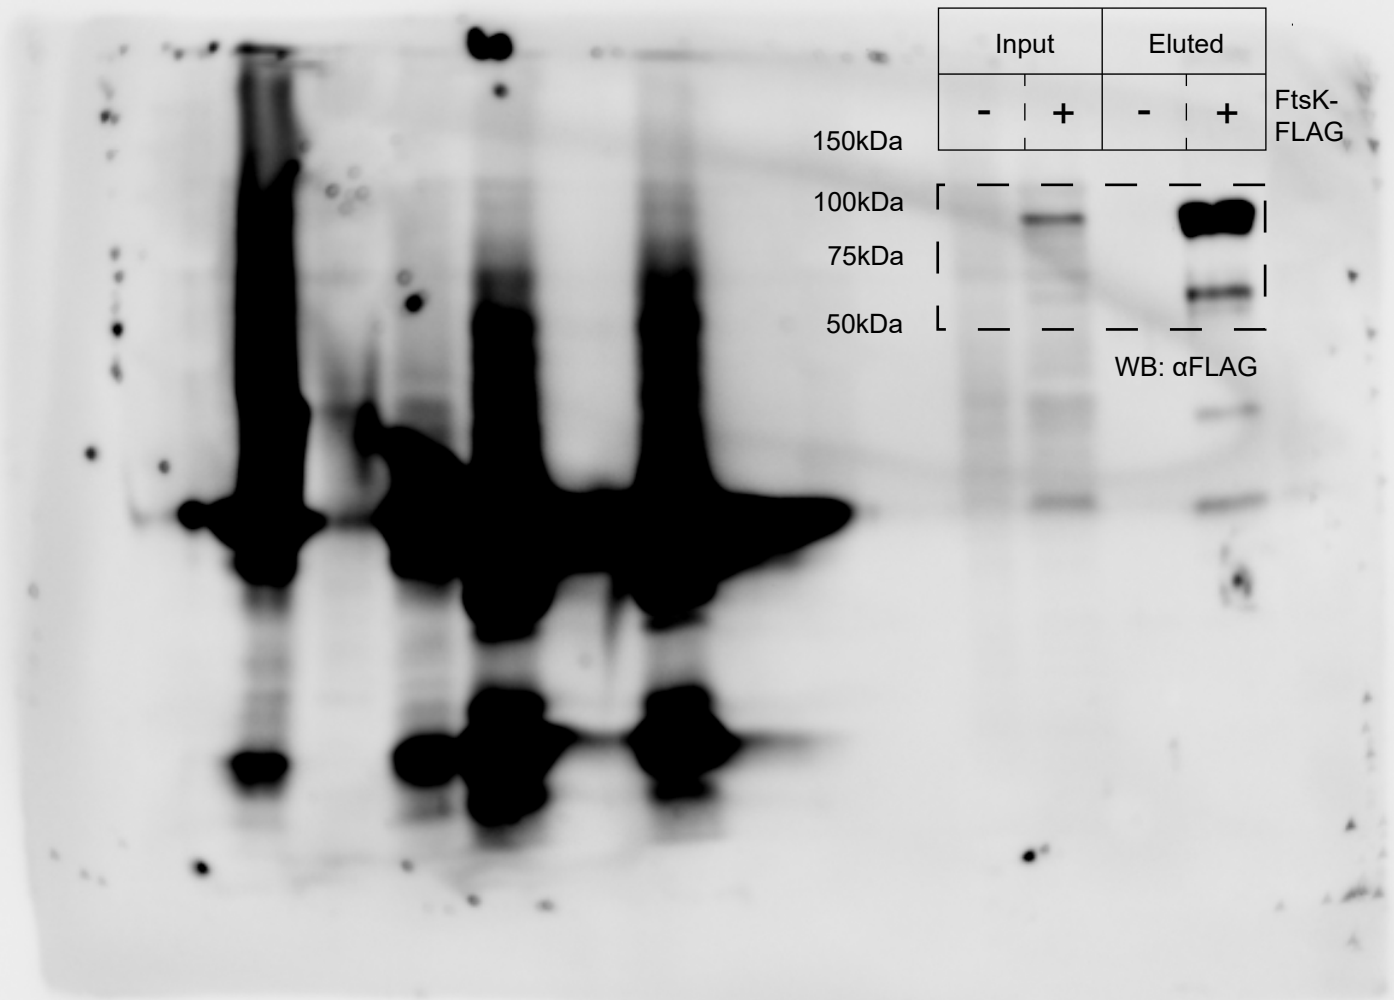

FtsK-FLAG IP

| Input |   | Eluted |   | FtsK-FLAG |
|-------|---|--------|---|-----------|
| -     | + | -      | + |           |

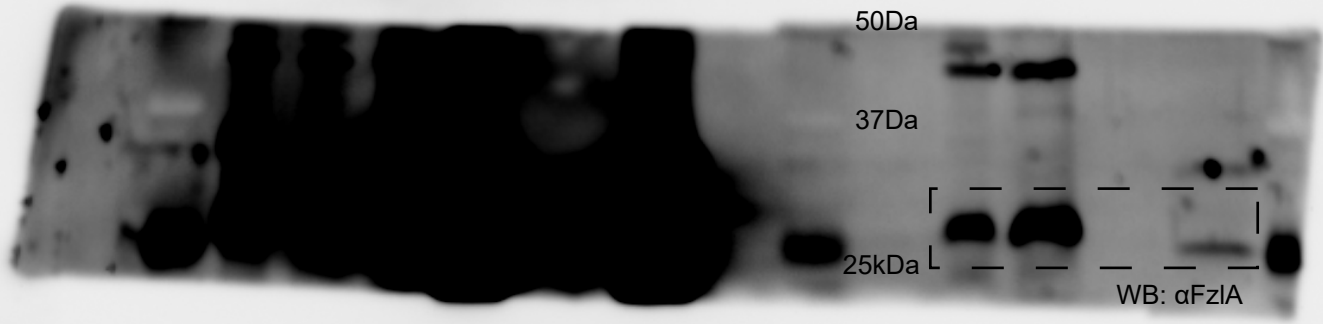

Supplement: JCB_202211026_SourceDataF7.pdf [file JCB_202211026_SourceDataF7.pdf]
